# Supplementary material for: Extractive and oxidative desulfurization of model oil in polyethylene glycol
Source: Royal Society of Chemistry journal article supplement (doi:10.1039/c6ra00996d), 2016-01-01
Supplement: c6ra00996d1.pdf [file c6ra00996d1.pdf]

## Supporting Information

### **Extractive and oxidative desulfurization of model oil in polyethylene glycol**

Jianlong Wang,<sup>a\*</sup> Rijing Zhao,<sup>b</sup> Baixin Han,<sup>a</sup> Nan Tang<sup>a</sup> and Kaixi Li<sup>a</sup>

<sup>a</sup> *Institute of Coal Chemistry, Chinese Academy of Science, Taiyuan, 030001, P. R. China. Fax: +86-351-4250292; Tel: +86-351-4048751; E-mail: jianlong.wang@hotmail.com*

<sup>b</sup> *Graduate University of Chinese Academy of Sciences, Beijing 100049, P. R. China*

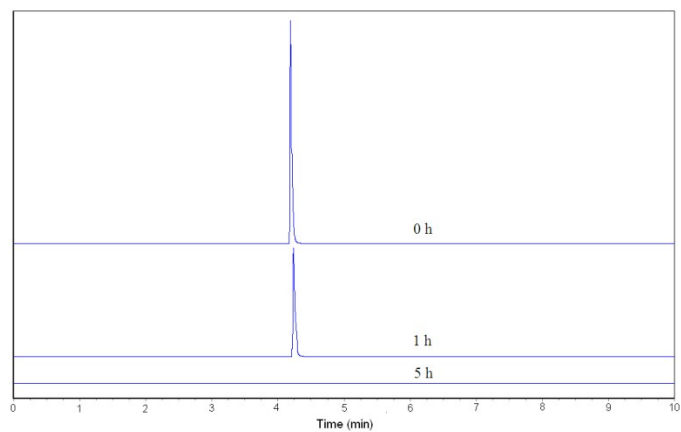

**Fig.S1** Sulfur specific of GC-FPD chromatograms for the extractive and oxidative desulfurization of DBT. (Conditions: DBT, 500 $\mu$ g/mL; model oil 5, mL; PEG-200, 0.7 mL; catalyst, 10mg; O/S=6; reaction temperature, 60 $^{\circ}$ C; reaction time, 5 h)

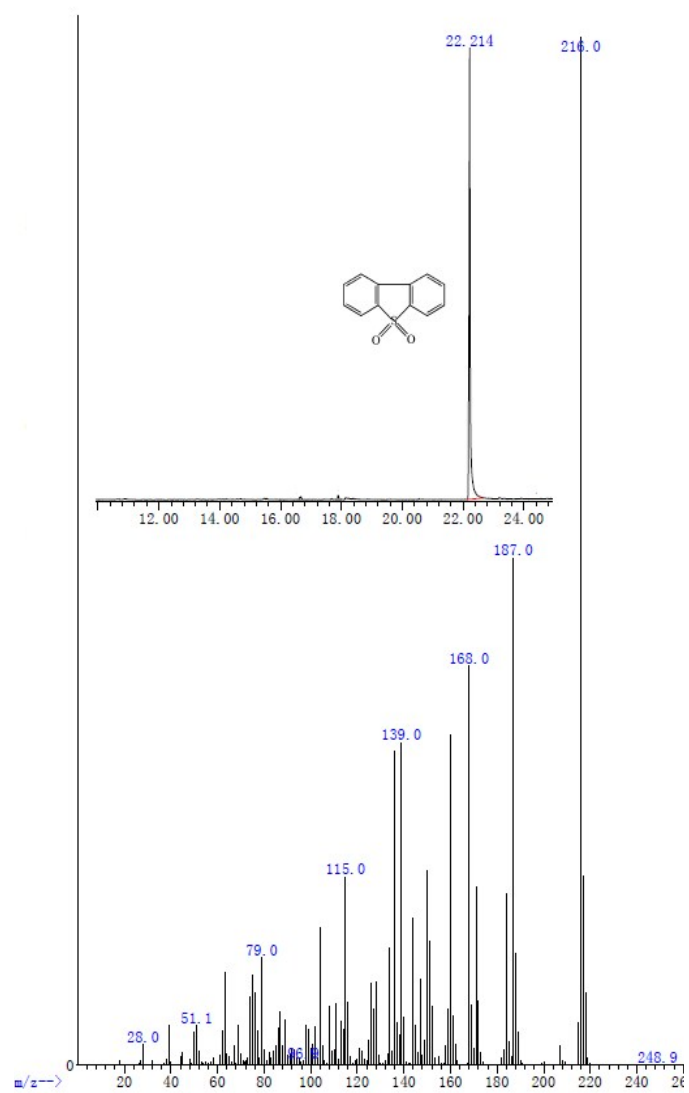

**Fig.S2** The GC-MS spectrogram of the oxidized productions of DBT
